# Supplementary material for: Nerve growth factor inhibition with tanezumab influences weight-bearing and subsequent cartilage damage in the rat medial meniscal tear model
Source: PubMed Central journal article supplement — Ann Rheum Dis. 2016 Jul 5;76(1):295–302. doi: 10.1136/annrheumdis-2015-208913 (PMC5264211; doi:10.1136/annrheumdis-2015-208913), 2016-07-05
Supplement: annrheumdis-2015-208913supp_tables.pdf [file annrheumdis-2015-208913supp_tables.pdf]

**Supplementary Table S1.** Mean (SE) gait deficiency (%) of rats in the delayed treatment study. Animals were treated on days 23 and 30 or 57 and 64 post MMT surgery.

|                                 |          | <b>Mean (SE) Gait Deficiency (%)</b> |                     |                    |                      |                     |                    |
|---------------------------------|----------|--------------------------------------|---------------------|--------------------|----------------------|---------------------|--------------------|
| <b>Day<br/>Post<br/>Surgery</b> | <b>n</b> | <b>Sham Surgery,</b>                 | <b>MMT Surgery,</b> | <b>MMT Surgery</b> | <b>Sham Surgery,</b> | <b>MMT Surgery,</b> | <b>MMT Surgery</b> |
|                                 |          | <b>Vehicle</b>                       | <b>Vehicle</b>      | <b>Tanezumab</b>   | <b>Vehicle</b>       | <b>Vehicle</b>      | <b>Tanezumab</b>   |
|                                 |          | <b>Control</b>                       | <b>Control</b>      | <b>0.1 mg/kg</b>   | <b>Control</b>       | <b>Control</b>      | <b>0.1 mg/kg</b>   |
|                                 |          | <b>Days 23, 30</b>                   | <b>Days 23, 30</b>  | <b>Days 23, 30</b> | <b>Days 57, 64</b>   | <b>Days 57, 64</b>  | <b>Days 57, 64</b> |
| -3                              | 10       | 5 (2)                                | 1 (2)               | -8 (4)             | 2 (1)                | 3 (2)               | 1 (2)              |
| 3                               | 10       | 1 (3)                                | 21 (3)              | 19 (4)             | 2 (2)                | 22 (3)              | 19 (3)             |
| 7                               | 10       | 4 (1)                                | 14 (2)              | 12 (2)             | 3 (2)                | 20 (2)              | 14 (3)             |
| 14                              | 10       | 0 (2)                                | 7 (2)               | 7 (2)              | -1 (2)               | 14 (3)              | 10 (2)             |
| 21                              | 10       | -3 (1)                               | 1 (1)               | 4 (2)              | -5 (2)               | 3 (2)               | -2 (1)             |
| 28                              | 10       | -1 (3)                               | 8 (2)               | 3 (1)              | 1 (20)               | 5 (3)               | 2 (2)              |
| 37                              | 10       | -4 (2)                               | -1 (2)              | 2 (2)              | NA                   | NA                  | NA                 |
| 42                              | 10       | NA                                   | NA                  | NA                 | -1 (1)               | 6 (2)               | 3 (2)              |
| 56                              | 10       | NA                                   | NA                  | NA                 | 4 (2)                | 7 (2)               | 4 (2)              |
| 63                              | 10       | NA                                   | NA                  | NA                 | 0 (3)                | 7 (2)               | 4 (2)              |
| 71                              | 10       | NA                                   | NA                  | NA                 | -2 (2)               | 7 (3)               | 3 (2)              |

**Supplementary Table S2.** Plasma (mean  $\pm$  SD) tanezumab concentrations from male Lewis rats treated weekly (SC injection). Separate mean values are provided for rats treated with 0.1 mg/kg that were ADA negative.

| Termination Day | Tanezumab Dose (mg/kg/wk) | Animals | n  | Tanezumab (ng/mL) |                    |                    |
|-----------------|---------------------------|---------|----|-------------------|--------------------|--------------------|
|                 |                           |         |    | Day 7             | Day 14             | Day 28             |
| 7               | 0.1                       | All     | 10 | 468 $\pm$ 82      | -                  | -                  |
| 7               | 0.1                       | ADA (-) | 6  | 503 $\pm$ 66      | -                  | -                  |
| 7               | 1                         | All     | 10 | 6843 $\pm$ 785    | -                  | -                  |
| 7               | 10                        | All     | 10 | 60094 $\pm$ 6157  | -                  | -                  |
| 14              | 0.1                       | All     | 10 | 543 $\pm$ 98      | 781 $\pm$ 310      | -                  |
| 14              | 0.1                       | ADA (-) | 6  | 593 $\pm$ 76      | 948 $\pm$ 79       | -                  |
| 14              | 1                         | All     | 10 | 7894 $\pm$ 599    | 12071 $\pm$ 775    | -                  |
| 14              | 10                        | All     | 10 | 71853 $\pm$ 7927  | 106447 $\pm$ 7048  | -                  |
| 28              | 0.1                       | All     | 10 | 648 $\pm$ 174     | 978 $\pm$ 311      | 1364 $\pm$ 339     |
| 28              | 0.1                       | ADA (-) | 7  | 599 $\pm$ 167     | 987 $\pm$ 236      | 1463 $\pm$ 225     |
| 28              | 1                         | All     | 10 | 7933 $\pm$ 677    | 13272 $\pm$ 790    | 19831 $\pm$ 1806   |
| 28              | 10                        | All     | 10 | 64879 $\pm$ 6497  | 114981 $\pm$ 12319 | 163124 $\pm$ 22790 |

ADA (-), animals serum-negative for anti-drug antibodies; SC, subcutaneous.
